# Supplementary material for: A ratiometric nanoprobe consisting of up-conversion nanoparticles functionalized with cobalt oxyhydroxide for detecting and imaging ascorbic acid
Source: Royal Society of Chemistry journal article supplement (doi:10.1039/c6tb02606k), 2016-11-15
Supplement: c6tb02606k1.pdf [file c6tb02606k1.pdf]

## Supporting Information

### **Cobalt Oxyhydroxide Assembled Upconversion Nanoparticles as a Ratiometric Nanoprobe for Ascorbic Acid Detecting and Imaging**

*Qingxin Han, Zhe Dong, Xiaoliang Tang, Li Wang, Zhenghua Ju and Weisheng Liu\**

† Key Laboratory of Nonferrous Metal Chemistry and Resources Utilization of Gansu Province and State Key Laboratory of Applied Organic Chemistry, Key Laboratory of Special Function Materials and Structure Design, Ministry of Education, College of Chemistry and Chemical Engineering, Lanzhou University, Lanzhou, 730000, China.

\*Corresponding author. Tel: +86/931/8915151

Fax number: +86/931/8912582

E/mail: [liuws@lzu.edu.cn](mailto:liuws@lzu.edu.cn)

## Table of Contents

1. Materials and instruments.
2. XRD patterns (**Fig. S1**).
3. FT-IR spectra of CoOOH, ligand-free core-shell UCNPs, and CoOOH modified UCNPs (**Fig. S2**).
4. UV-vis absorption of aqueous solution of CoCl<sub>2</sub>, CoOOH solution, supernates of CoOOH-modified UCNPs solution and CoOOH-modified UCNPs solution with AA (**Fig. S3**).
5. The luminescence lifetime decay profile (**Fig. S4**).
6. UCL spectra of aqueous solutions of UCNPs, physical mixture of CoOOH and UCNPs, and CoOOH-modified UCNPs (**Fig. S5**).
7. UCL ratios of CoOOH-modified UCNPs in different pH solution (**Fig. S6**).
8. Photograph changes of CoOOH-modified UCNPs solution (**Fig. S7**).
9. Time-dependent UCL intensity ratio  $I_{475}/I_{654}$  changes of CoOOH-modified UCNPs and UCNPs (**Fig. S8**).
10. Time-dependent UCL intensity (475 nm) changes of CoOOH-modified UCNPs with AA (**Fig. S9**).
11. UCL intensity ratio  $I_{475}/I_{654}$  changes of CoOOH-modified UCNPs as a function of AA concentration (**Fig. S10**).
12. Cyclic voltammograms of AA, GSH, Cys and Hcy in HEPES solution (**Fig. S11**).
13. UCL spectra of fetal bovine serum in the absence AA under UV-vis and near-infrared, respectively (**Fig. S12**).
14. EDX of UCNPs and CoOOH-modified UCNPs. (**Fig. S13-14**)
15. TG-DSC results (**Fig. S15-17**).

### ***Materials and instruments***

Yb<sub>2</sub>O<sub>3</sub> (99.9%), Tm<sub>2</sub>O<sub>3</sub> (99.9%), Y<sub>2</sub>O<sub>3</sub> (99.9%), Gd<sub>2</sub>O<sub>3</sub> (99.9%), were obtained from Tianjin Guangfu Fine Chemical Research Institute. 1-octadecene (90%), oleic acid (90%), and YCl<sub>3</sub>·6H<sub>2</sub>O were purchased from Alfa Aesar. The other reagents used without further purification were received from commercial sources. Thermo gravimetric analysis (TGA) was conducted on Netzsch STA449F3 Jupiter® thermal analyzer up to 800 °C at a heating rate of 10 °C·min<sup>-1</sup> in N<sub>2</sub> atmosphere. Transmission electron microscopy (TEM) was obtained on a Tecnai-G2-F30 (300 kV). X-ray diffraction (XRD) pattern of the synthesized products were recorded with a Rigaku D/MAX 2400 X-ray diffractometer using Cu K $\alpha$  radiation ( $\lambda$  = 0.154056 Å). Fluorescence spectra were recorded on a Hitachi F-7000 spectrofluorometer equipped with a 0-5 W adjustable CW laser (980 nm, Connect Fiber Optics, China) as the excitation source. The lifetimes were determined by FLS920 of Edinburgh Instruments. Cyclic voltammograms were identified by a CHI660B electrochemical Workstation (CH Instruments, Inc., USA) using platinum (Pt) wire and Ag/AgCl (*aq.* saturated KCl) as the counter and reference electrodes, respectively. Glassy carbon electrode (3 mm) was used as the working electrode with scan rate of 5 mV s<sup>-1</sup>. All pH measurements were executed with a pH-10C digital pH meter. HeLa cells were provided by the Institute of Biochemistry and Cell Biology (China) were cultured for 48 h in culture in DMEM (Dulbecco's Modified Eagle's Medium, High Glucose) with 10% fetal bovine serum (FBS) in an atmosphere of 5% CO<sub>2</sub> and 95% at 37 °C with a humidified incubator.

**Supporting Figures:**

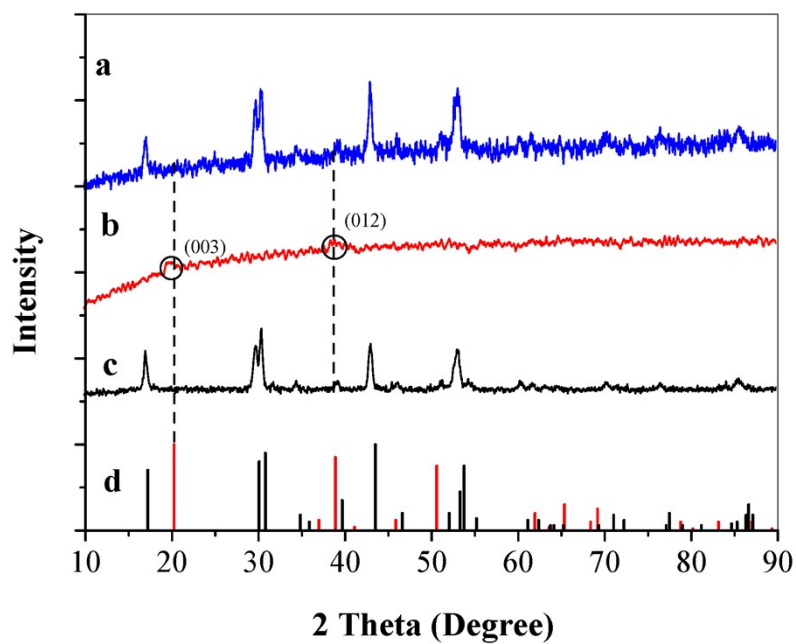

**Fig. S1.** XRD patterns of ligand-free core-shell UCNPs (a), CoOOH (b), and CoOOH-modified UCNPs (c), standard XRD patterns for CoOOH nanocrystals (JCPDS, Card No.07-0169) (red) and NaYF<sub>4</sub> UCNPs (JCPDS, Card No.16-0334) (black) (d).

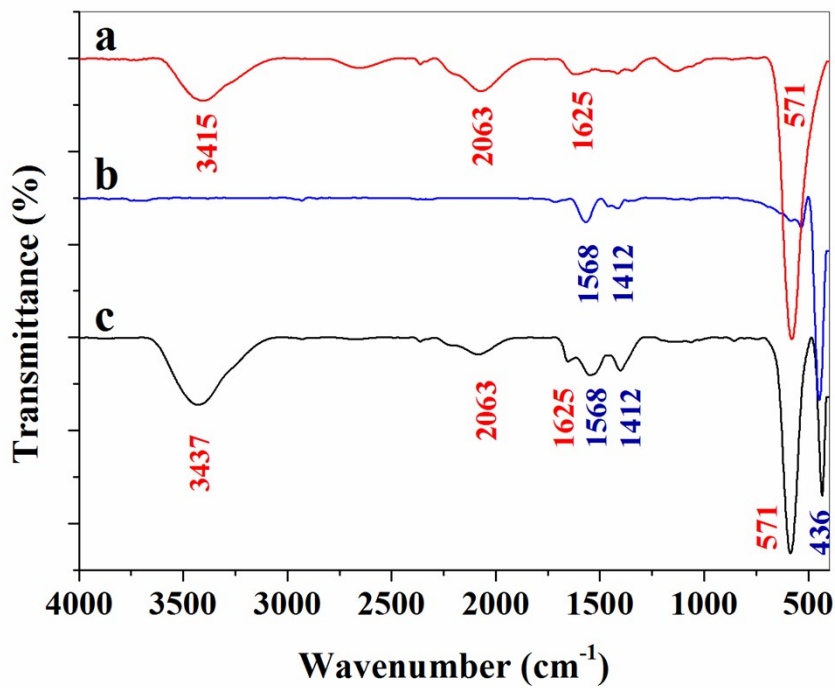

**Fig. S2.** FT-IR spectra of CoOOH (a), ligand-free core-shell UCNPs (b), and CoOOH modified UCNPs (c).

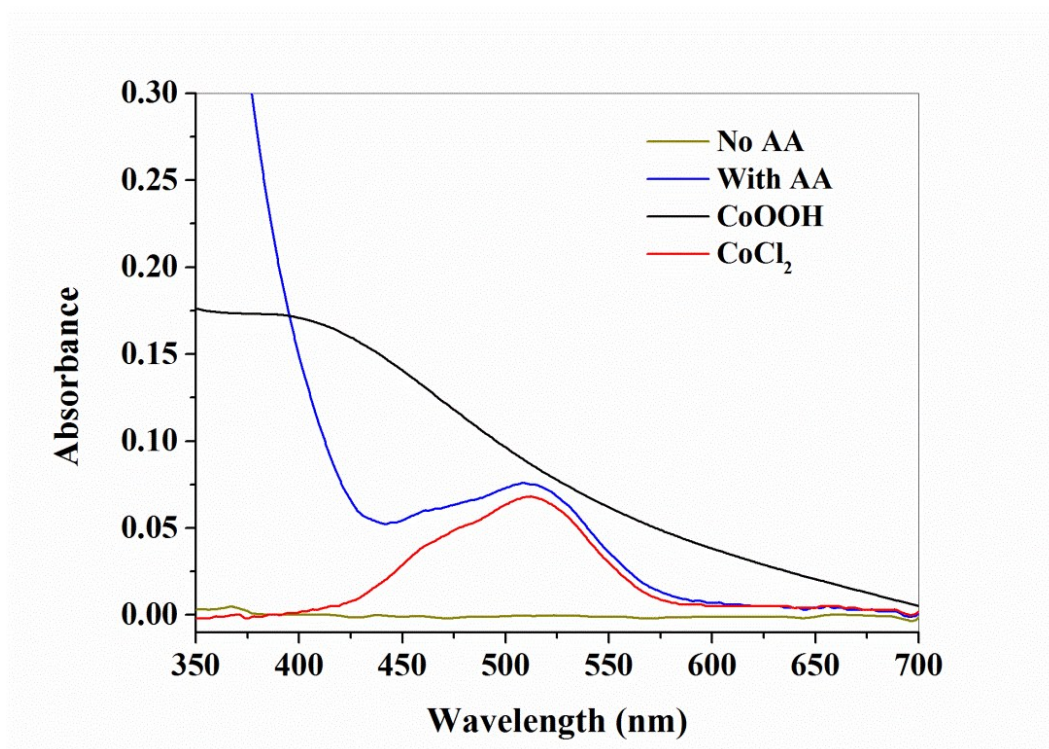

**Fig. S3.** UV-vis absorption of aqueous solution of CoCl<sub>2</sub> (red line), CoOOH solution (black line), supernates of CoOOH-modified UCNP solution (brown line) and CoOOH-modified UCNP solution with AA (blue line).

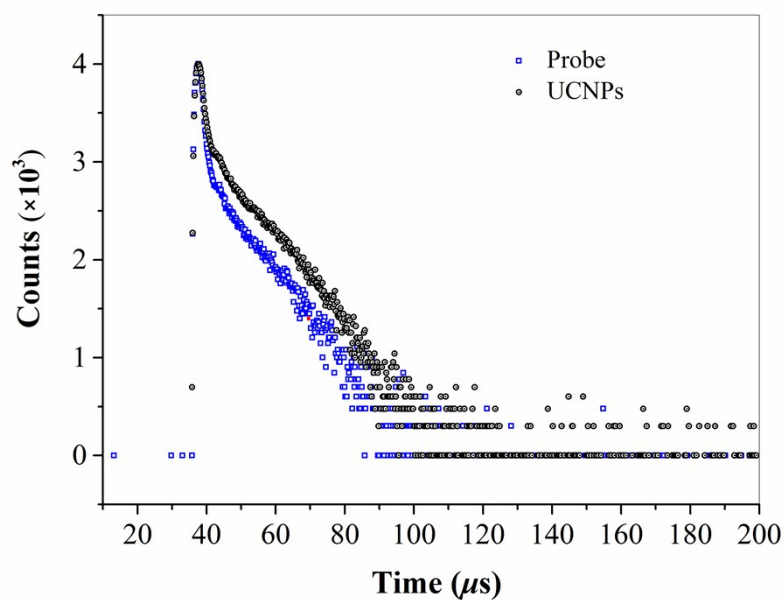

**Fig. S4.** The luminescence (475 nm) lifetime decay profile of bared UCNP (black dots) and CoOOH-modified UCNP (blue dots).

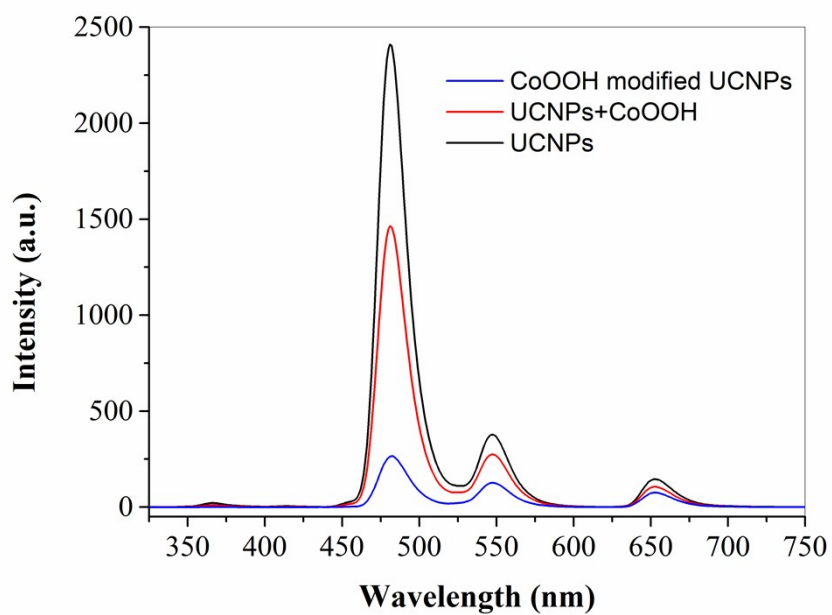

**Fig. S5.** UCL spectra of aqueous solutions of UCNPs (1mg/mL, black line), physical mixture of CoOOH (2 mmol) and UCNPs (blue line), and CoOOH-modified UCNPs (prepared with 2.0 mmol CoCl<sub>2</sub>, red line).

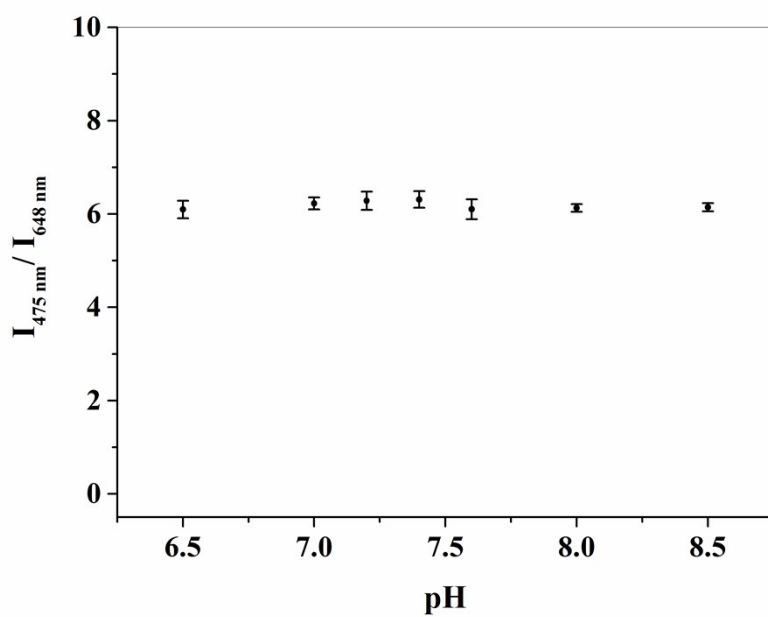

**Fig. S6.** UCL intensity of CoOOH modified UCNPs (1mg/mL) in different pH solutions in the absence (black dots) and presence (red dots) of AA (100  $\mu$ M).

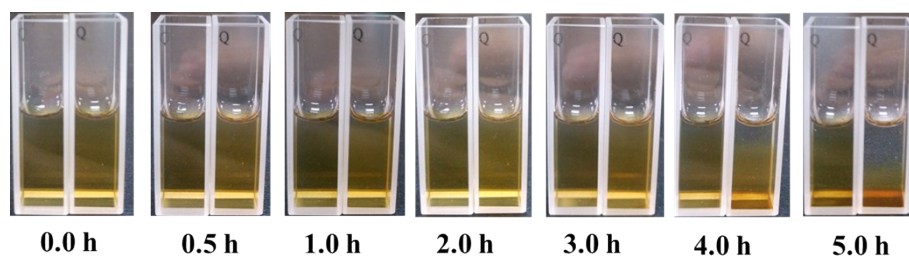

**Fig. S7.** Photograph changes of CoOOH-modified UCNPs (1 mg/mL) solution with (left) and without (right) 10% ethylene glycol (EG) over time. EG was also introduced as the dispersant into sensing system to improve the stability of a probe. Due to the small size of CoOOH-modified UCNPs, the improvement in our probe is limited. In this regard, EG has not been introduced in the sensing study of CoOOH-modified UCNPs nano-syestem.

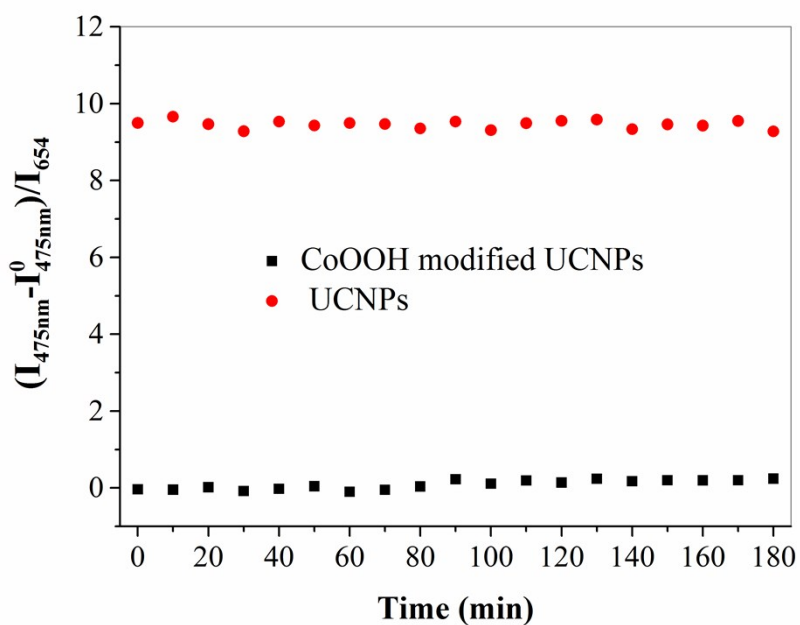

**Fig. S8.** Time-dependent UCL intensity ratio changes of CoOOH-modified UCNPs (1 mg/mL) (black dots) and UCNPs (red dots) depending on time in HEPES (10 mM, pH = 7.4).

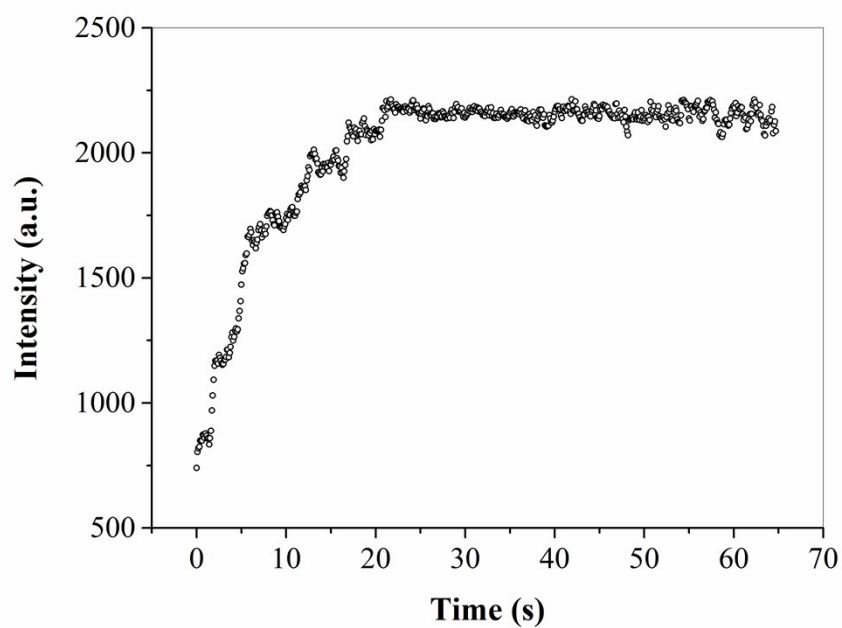

**Fig. S9.** Time-dependent UCL intensity (475 nm) changes of CoOOH-modified UCNPs (1 mg/mL) with AA (100  $\mu$ M)) in HEPES solution (10 mM, pH = 7.4).

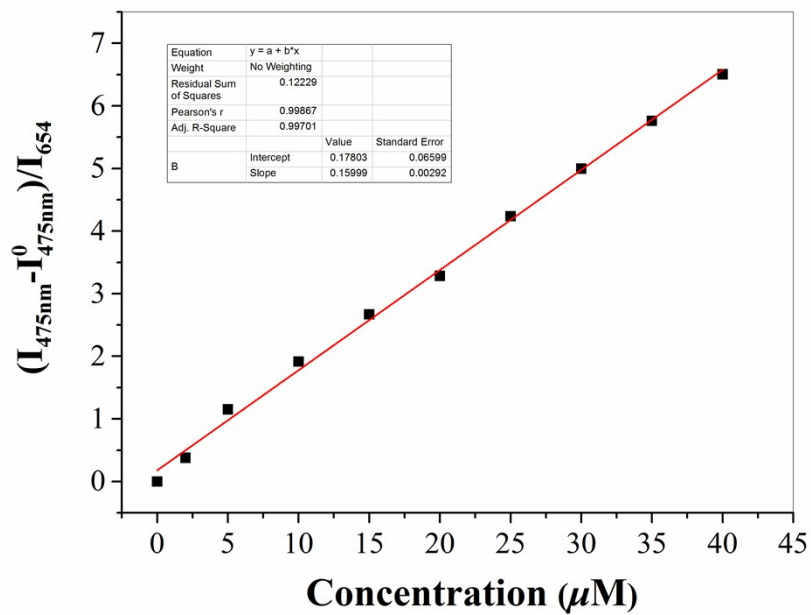

**Fig. S10.** UCL intensity ratio  $I_{475}/I_{468}$  changes of CoOOH modified UCNPs as a function of AA concentration in HEPES (10 mM, pH = 7.4).

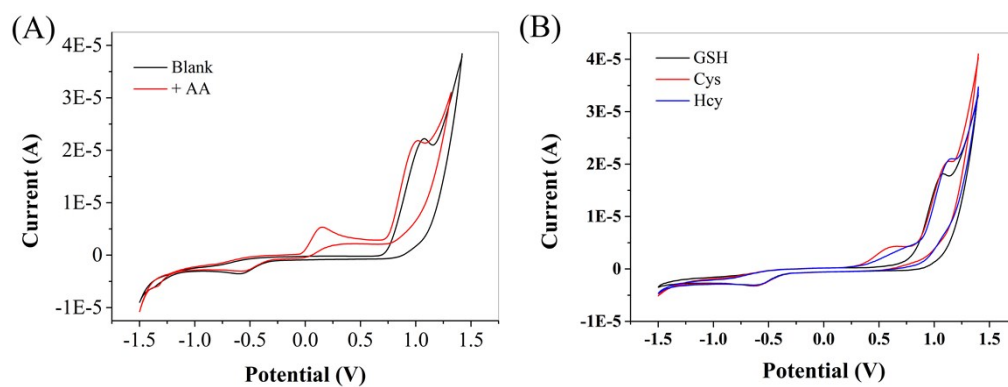

**Fig. S11.** Cyclic voltammograms of 1mM AA, GSH, Cys and Hcy in HEPES solution (10 mM, pH = 7.4).

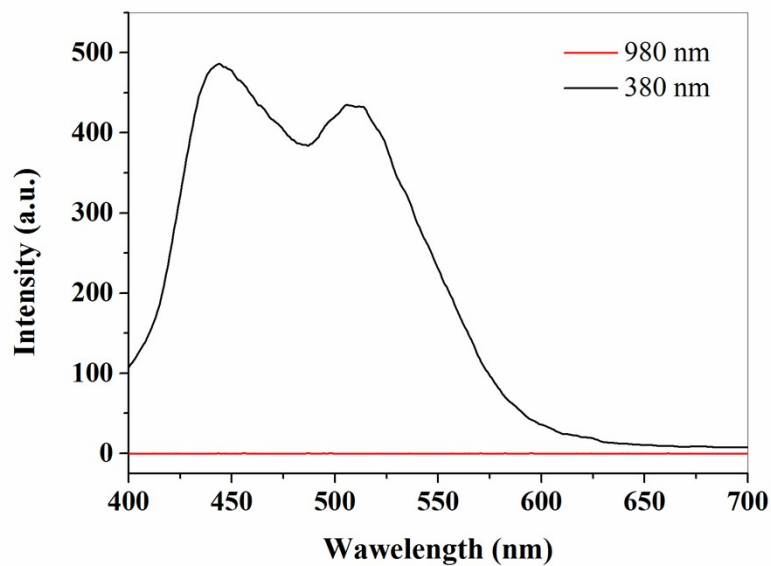

**Fig. S12.** UCL spectra of diluted (25 %) fetal bovine serum in the absence AA under excitation at 380 nm (black) and 980 nm (red).

## EDX

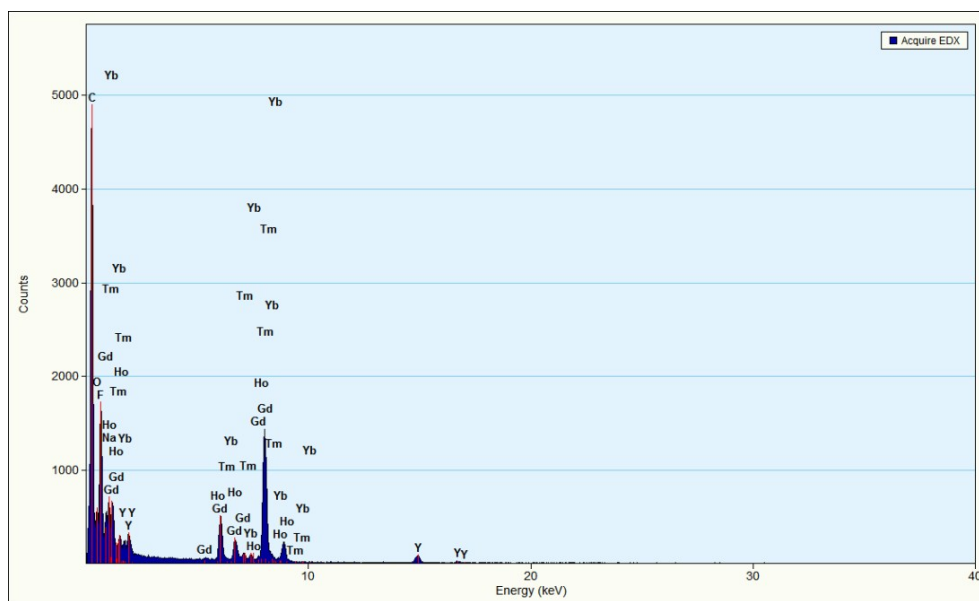

**Fig. S13.** EDX spectrum of UCNPs.

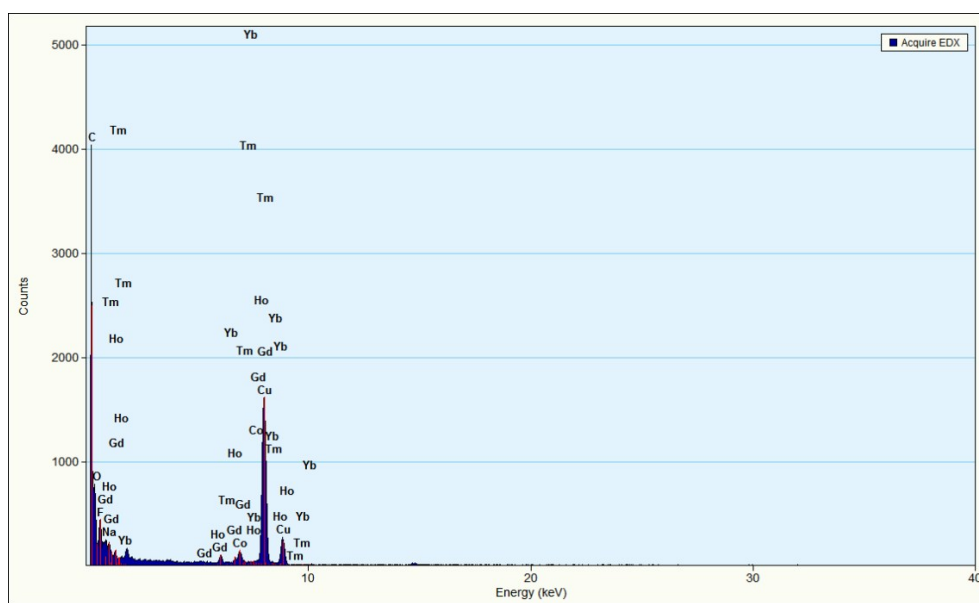

**Fig. S14.** EDX spectrum of CoOOH modified UCNPs.

**TG-DSC:**

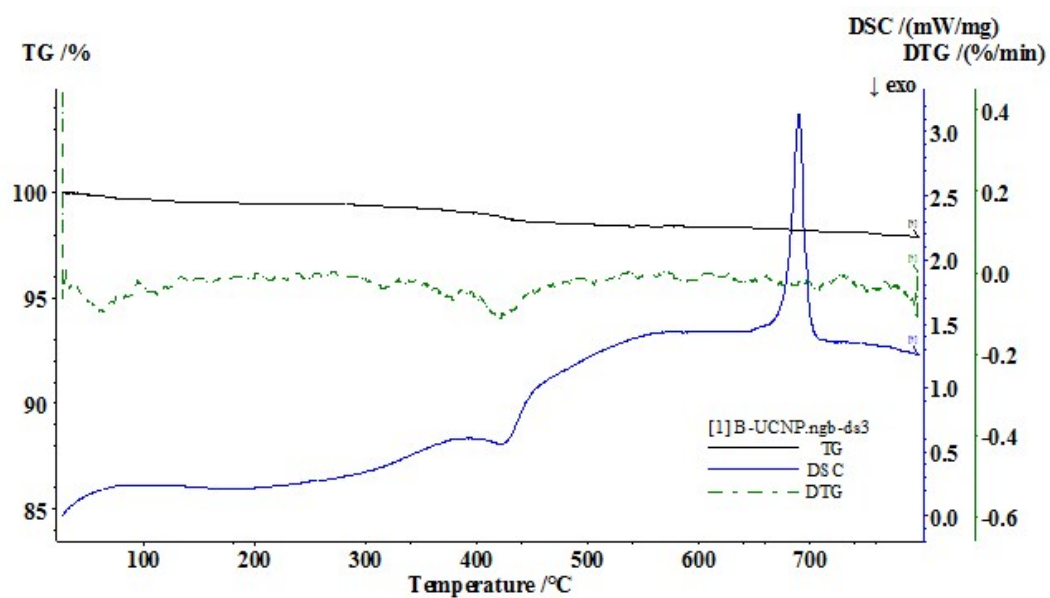

Fig. S15. TG-DSC result of ligand-free core-shell UCNPs.

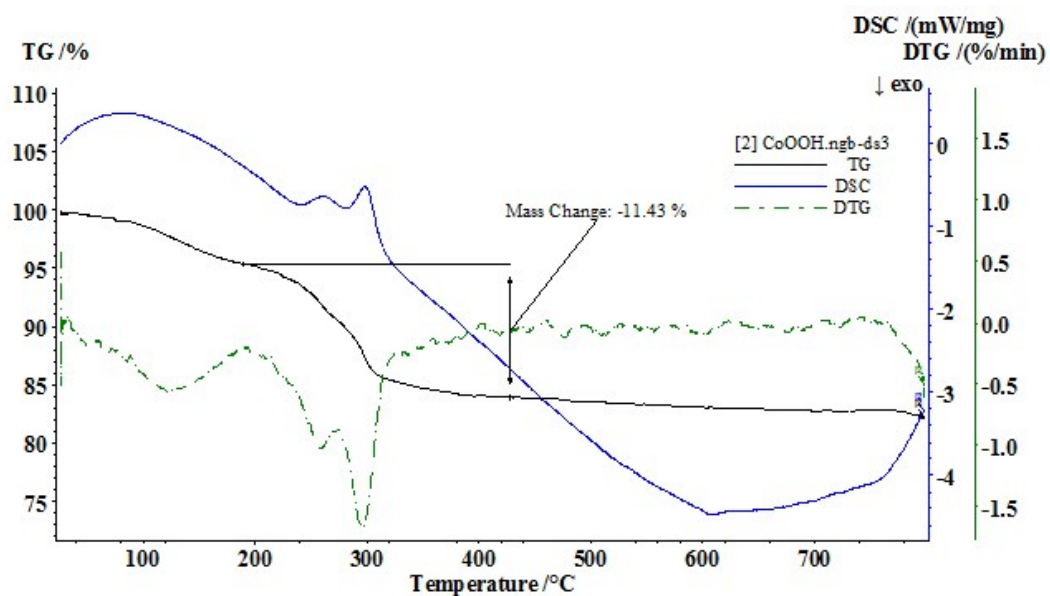

Fig. S16. TG-DSC result of CoOOH.

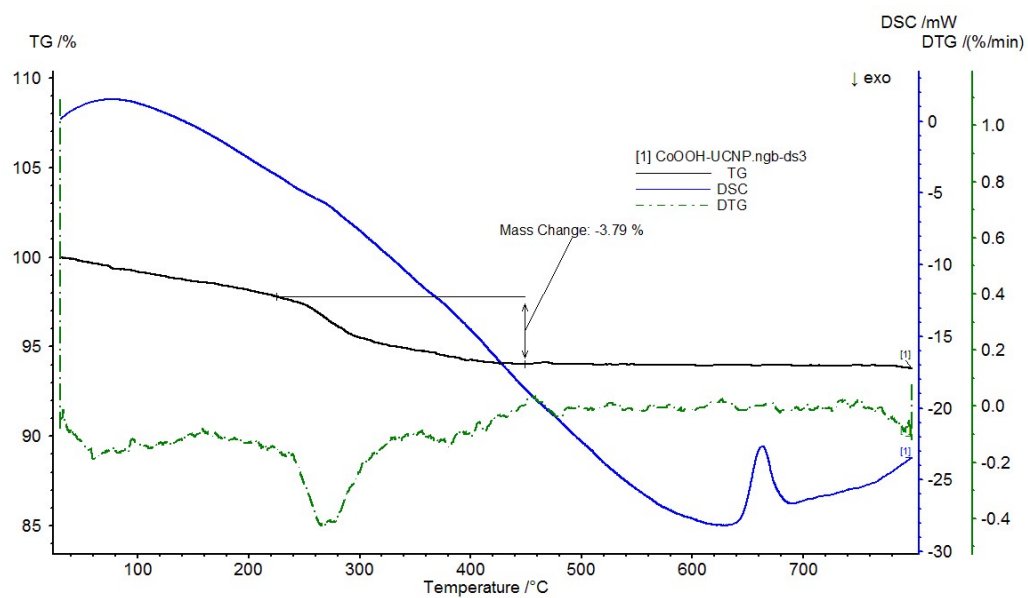

**Fig. S17.** TG-DSC result of CoOOH modified UCNPs.
